# Supplementary material for: Prediction of novel alloy phases of Al with Sc or Ta
Source: PubMed Central journal article supplement (PMC4423498; doi:10.1038/srep09909), 2015-05-07
Supplement: srep09909-s1.pdf [file srep09909-s1.pdf]

# Prediction of novel alloy phases of Al with Sc or Ta

A. Bilić, J.D. Gale, M.A. Gibson, N. Wilson and K. McGregor

## Supplementary Information

TABLE S1. Crystallographic information for the predicted stable alloy phases AlSc<sub>3</sub> and AlTa<sub>7</sub>, their elastic constants ( $C_{ij}$ ), bulk (B), shear (G) and Young (E) moduli and Poisson ratios ( $\nu$ ).

| alloy                 | AlSc <sub>3</sub> | AlTa <sub>7</sub> |
|-----------------------|-------------------|-------------------|
| space group           | 194               | 210               |
| a [Å]                 | 6.307             | 10.501            |
| c [Å]                 | 5.030             |                   |
| C <sub>11</sub> [GPa] | 119               | 302               |
| C <sub>12</sub> [GPa] | 45                | 121               |
| C <sub>13</sub> [GPa] | 33                |                   |
| C <sub>33</sub> [GPa] | 128               |                   |
| C <sub>44</sub> [GPa] | 49                | 46                |
| C <sub>66</sub> [GPa] | 37                |                   |
| B [GPa]               | 65                | 182               |
| G [GPa]               |                   | 46                |
| G <sub>yz</sub> [GPa] | 49                |                   |
| G <sub>xy</sub> [GPa] | 37                |                   |
| E [GPa]               |                   | 232               |
| E <sub>x</sub> [GPa]  | 98                |                   |
| E <sub>z</sub> [GPa]  | 115               |                   |
| $\nu$                 |                   | 0.29              |
| $\nu_{zx}$            | 0.20              |                   |
| $\nu_{xy}$            | 0.33              |                   |
| $\nu_{yz}$            | 0.17              |                   |
